# Supplementary material for: Cadmium metavanadate mixed oxide nanorods for the chemiresistive detection of methane molecules
Source: Royal Society of Chemistry journal article supplement (doi:10.1039/d0nj02690e), 2020-01-01
Supplement: d0nj02690e1.pdf [file d0nj02690e1.pdf]

Supplementary File

**Supplementary File 1:** Picture of Gas sensing set-up used in this study

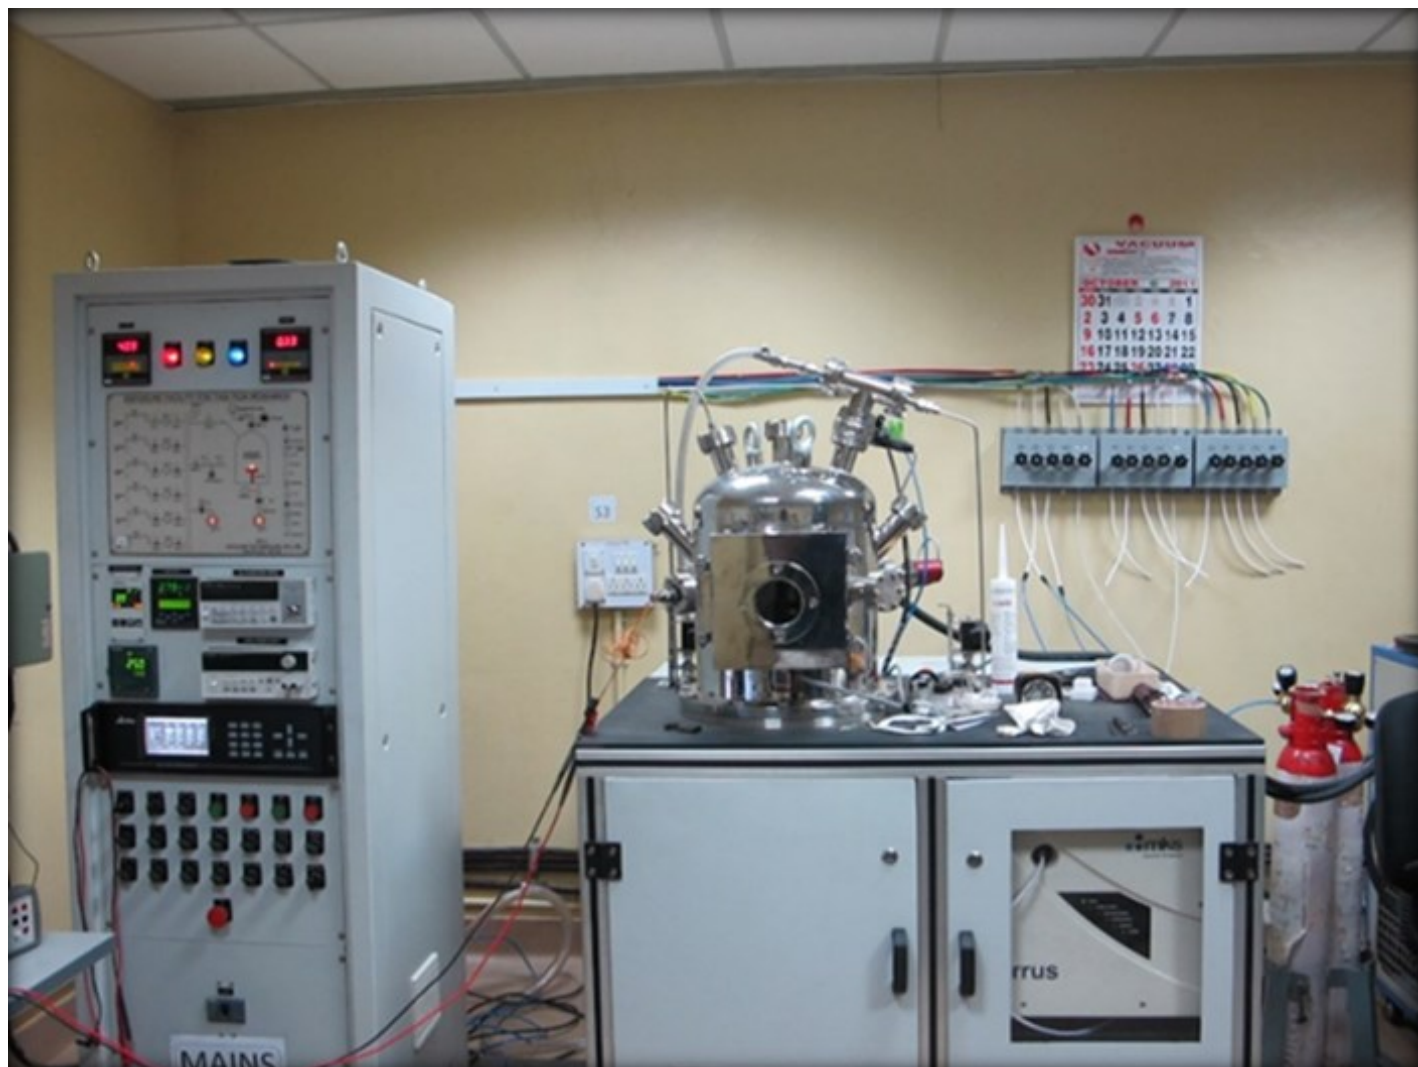

**Gas Sensing Set-up** <sup>42</sup>
